# Supplementary material for: Enhanced in vitro efficacy for inhibiting hypertrophic scar by bleomycin-loaded dissolving hyaluronic acid microneedles
Source: Royal Society of Chemistry journal article supplement (doi:10.1039/c9tb01449g), 2019-01-01
Supplement: c9tb01449g1.pdf [file c9tb01449g1.pdf]

*Electronic Supplementary Information:*

## **Enhanced *in vitro* Efficacy for Inhibiting Hypertrophic Scar by Bleomycin-loaded Dissolving Hyaluronic Acid Microneedles**

Ying Xie,<sup>‡,a</sup> Hua Wang,<sup>‡,b</sup> Jinzhu Mao,<sup>a</sup> Yuce Li,<sup>b</sup> Mubashir Hussain,<sup>b</sup> Jinjin Zhu,<sup>a</sup> Yan Li,<sup>\*,a</sup> Lianbin Zhang,<sup>b</sup> Juan Tao<sup>a</sup> and Jintao Zhu<sup>\*,b</sup>

<sup>a</sup> *Department of Dermatology, Union Hospital, Tongji Medical College, Huazhong University of Science and Technology (HUST), Wuhan 430022, China*

*E-mail: littlegong@163.com (Y. L.)*

<sup>b</sup> *Key Lab of Materials Chemistry for Energy Conversion and Storage of Ministry of Education (HUST), School of Chemistry and Chemical Engineering, HUST, Wuhan 430074, China*

*E-mail: jtzhu@mail.hust.edu.cn (J. Z.)*

<sup>‡</sup> *These authors contributed equally to this work.*

**Supporting Figures:**

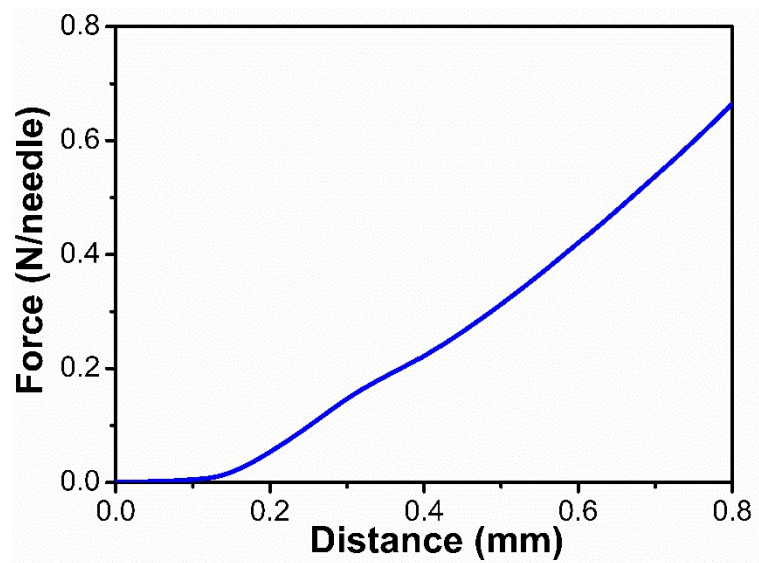

**Figure S1.** Mechanical property of BMN. Force curve was measured as a function of microneedle displacements.

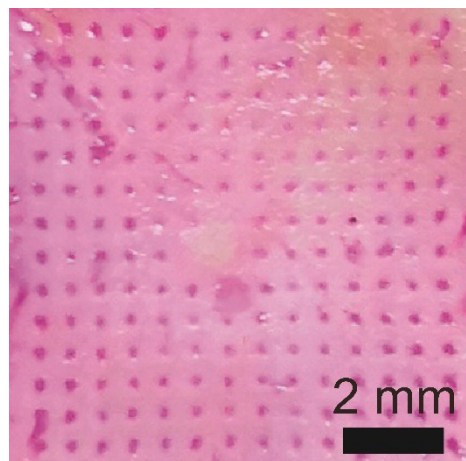

**Figure S2.** Optical microscopy image of porcine skin treated by rhodamine B loaded HA MNs. Red dots are the insertion sites.
